# Supplementary material for: Synthesis of pure and high-quality biodiesel from waste frying oil using CaO prepared from waste coralline sand
Source: Research Square preprint supplement (doi:10.21203/rs.3.rs-2738548/v1), 2023-04-26
Supplement: Supplementary file 1 [file 5ef8a7579a37539d7e4e6c60.docx]

**Highlights**

- Waste coralline sand derived CaO catalyst is an efficient catalyst for FAME conversion of 98%.
- Designed catalyst was stable and reusable up to five times.
- Basic nature of catalysts CaO is the main driving force in facilitating FAME synthesis.
- Green metrics study reveals that the WCS catalyst is environmental benign and cheaper by nature.
